# Supplementary material
Source: PubMed Central journal article supplement (PMC2860011)
Supplement: NIHMS172783-supplement-02.pdf [file NIHMS172783-supplement-02.pdf]

Figure S1

A

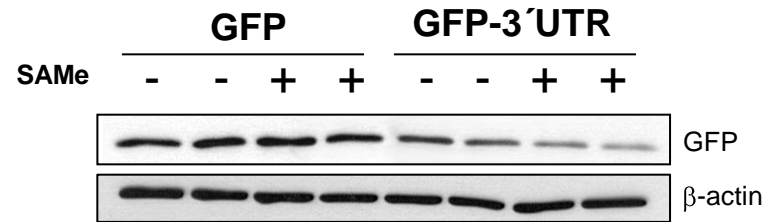

B

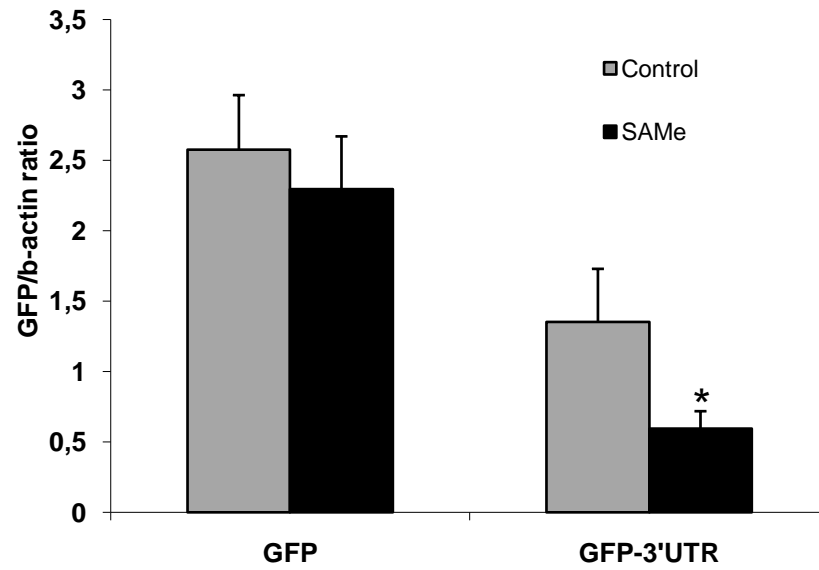

Figure S2

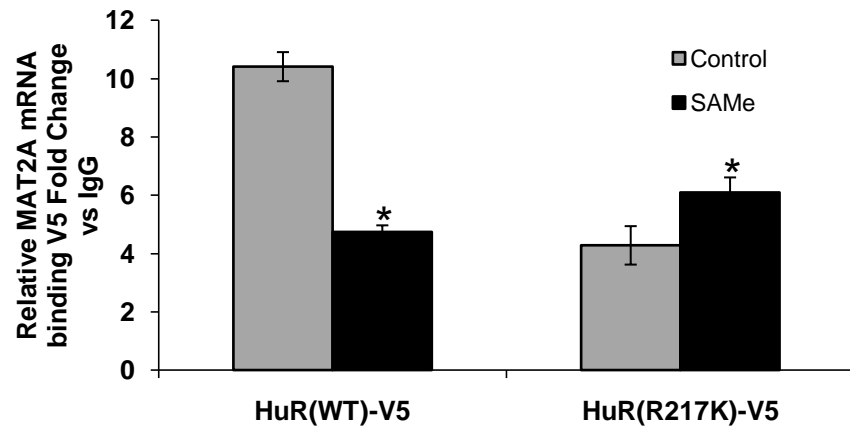

Figure S3

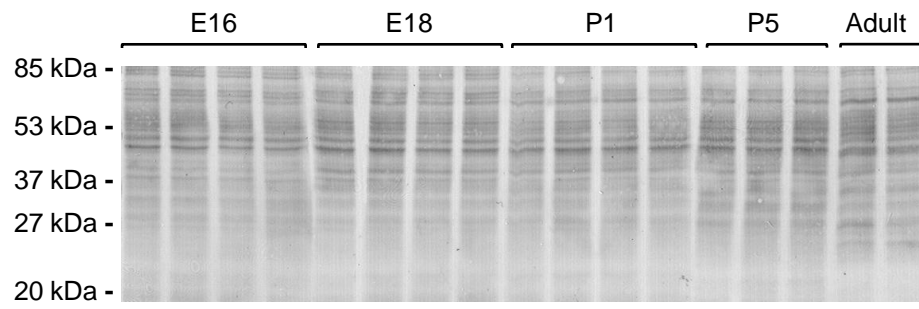

Table S1

|                    | <b>MAT2A-IP<br/>IgG</b> | <b>MAT2A-IP<br/>HuR</b> | <b>Average Fold Change<br/>(IP HuR/IP IgG)</b> | <b>Std Dev</b> |
|--------------------|-------------------------|-------------------------|------------------------------------------------|----------------|
| <b>Control 0h</b>  | 0,10                    | 0,59                    | 5,93                                           | 0,85           |
| <b>Control 6h</b>  | 0,25                    | 2,16                    | 8,60                                           | 1,13           |
| <b>Control 12h</b> | 0,46                    | 4,73                    | 10,20                                          | 2,05           |
| <b>Control 24h</b> | 0,50                    | 3,39                    | 6,78                                           | 1,20           |
| <b>SAM 6h</b>      | 1,22                    | 0,58                    | 0,47                                           | 0,11           |
| <b>SAM 12 h</b>    | 0,30                    | 0,39                    | 1,31                                           | 0,21           |
| <b>SAM 24h</b>     | 0,16                    | 0,36                    | 2,23                                           | 0,86           |

Table S2

|                    | <b>MAT2A-IP<br/>IgG</b> | <b>MAT2A-IP<br/>methyl-HuR</b> | <b>Average Fold Change<br/>(IP met-HuR/IP IgG)</b> | <b>Std Dev</b> |
|--------------------|-------------------------|--------------------------------|----------------------------------------------------|----------------|
| <b>Control 0h</b>  | 0,04                    | 0,03                           | 0,65                                               | 0,3            |
| <b>Control 6h</b>  | 0,06                    | 0,07                           | 1,02                                               | 0,2            |
| <b>Control 12h</b> | 0,09                    | 0,08                           | 0,87                                               | 0,2            |
| <b>Control 24h</b> | 0,06                    | 0,06                           | 1,09                                               | 0,6            |
| <b>SAM 6h</b>      | 0,01                    | 0,14                           | 13,71                                              | 1,2            |
| <b>SAM 12 h</b>    | 0,12                    | 0,74                           | 6,19                                               | 1,9            |
| <b>SAM 24h</b>     | 0,12                    | 0,34                           | 2,77                                               | 0,8            |
